# Supplementary material
Source: Springer Nature journal article supplement (https://www.springermedizin.de/resource/supplementary/12933_2012_440_MOESM5_ESM.pdf/9538538)

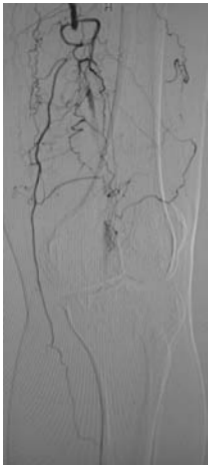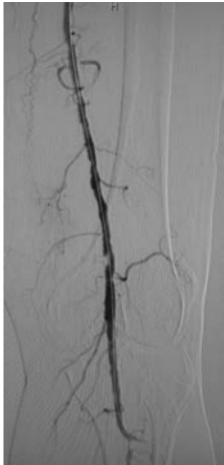

Supplement: MOESM5 [file 9538538]
